# Supplementary material
Source: PubMed Central journal article supplement (PMC4030655)
Supplement: Supp_Figure1.pdf [file Supp_Figure1.pdf]

## Supplementary Data

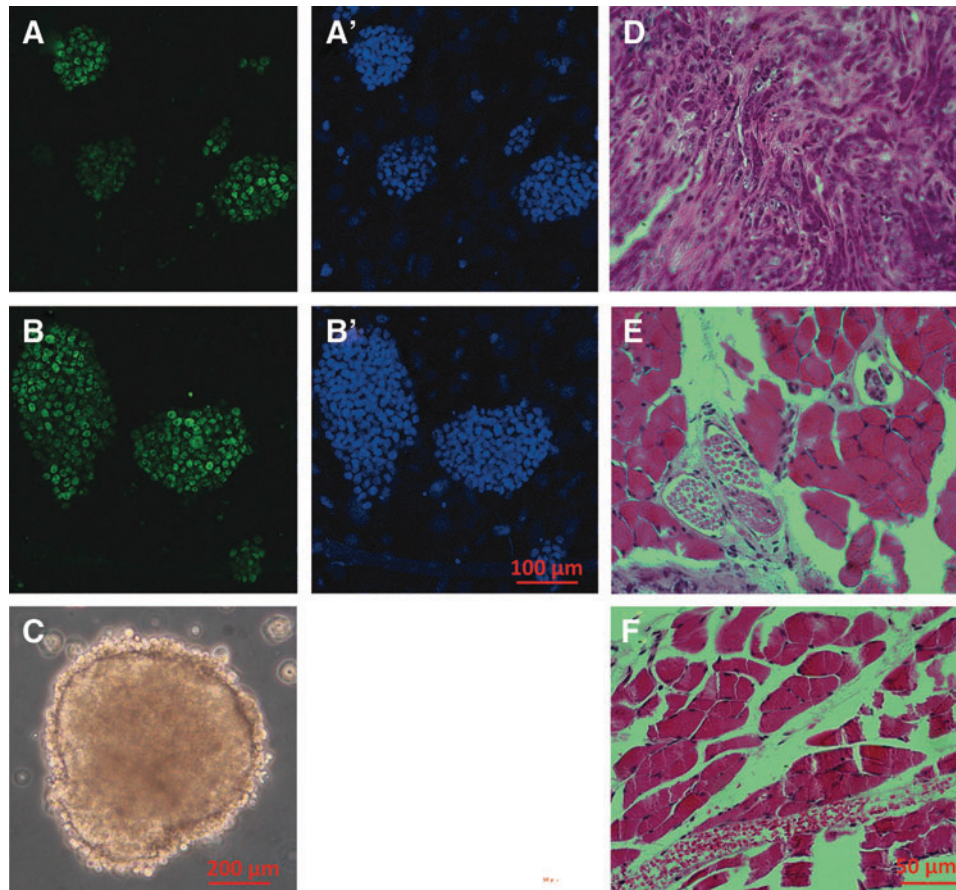

**SUPPLEMENTARY FIG. S1.** Characterization of the porcine iPSCs. (A–B') Immunostaining for pluripotency markers of stable porcine iPSCs. Antibodies to OCT4 and SOX2 were used for immunostaining with fluorescein isothiocyanate (FITC)-conjugated secondary antibody (green), DNA was counterstained with Hoechst 33342 (blue). Scale bar, 100  $\mu\text{m}$ . (C) Embryoid body (EB) formation of porcine iPSCs. Scale bar, 200  $\mu\text{m}$ . (D–F) Histological assessment of teratomas derived from porcine iPSCs. Hepatocyte represents the endoderm (D); neural tissues represent the ectoderm (E); cartilage tissue represents the mesoderm (F). Scale bar, 50  $\mu\text{m}$ .
