# Supplementary material
Source: PubMed Central journal article supplement (PMC4030655)
Supplement: Supp_Figure2.pdf [file Supp_Figure2.pdf]

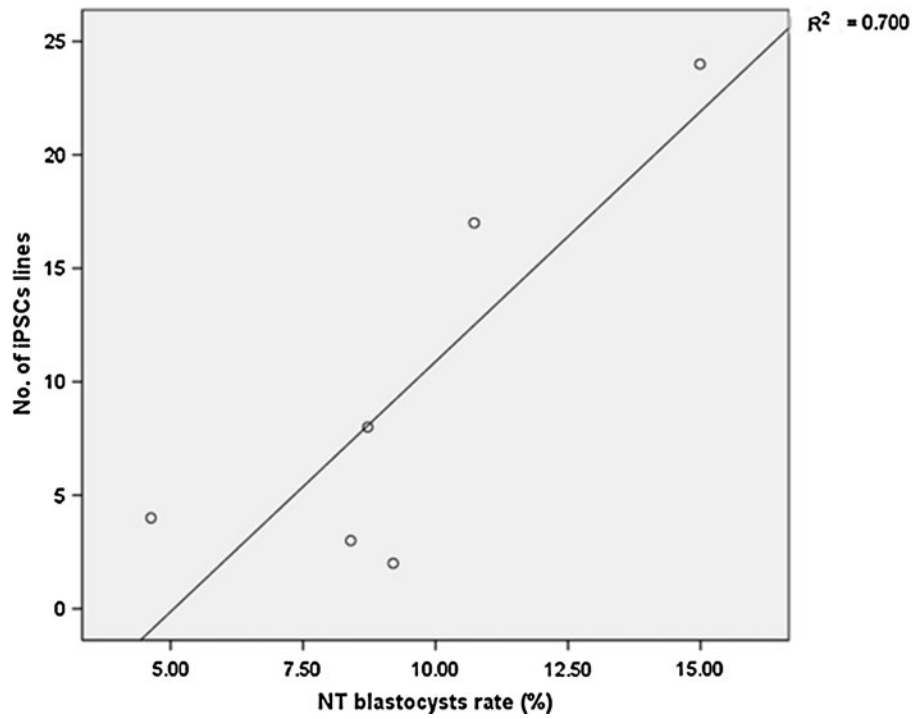

**SUPPLEMENTARY FIG. S2.** Correlation analysis of the relationship of the efficiency of iPSC induction and the development rate of SCNT embryos. The correlation coefficient was 0.7.  $p < 0.05$ , analyzed by Pearson correlation.
