# Supplementary material
Source: PubMed Central journal article supplement (PMC4030655)
Supplement: Supp_Table1.pdf [file Supp_Table1.pdf]

SUPPLEMENTARY TABLE S1. PRIMER SEQUENCES FOR REAL-TIME PCR

| <i>Gene</i>    | <i>Accession number</i> | <i>Primer sequence</i>                                       |
|----------------|-------------------------|--------------------------------------------------------------|
| <i>Oct4-V</i>  | NM_001252452.1          | F: GAGGCCCTTGGAAGCTTAGCC<br>R: CCCAGTGTGGTGGTACGGGAAATC      |
| <i>Myc-V</i>   | NM_001177352.1          | F: CAGTGTGGTGGTACGGGAAATC<br>R: GATGAAATAGGGCTGTACGGAGTC     |
| <i>Oct4-en</i> | NM_001113060.1          | F: GGCTCCCCCATGCATTCAAAC<br>R: TCCCTCCAACCAGTTCCCCTAGAC      |
| <i>Myc-en</i>  | X97040.1                | F: GGAACTCTTGCCCATAAATTGACCTA<br>R: AAGGTTGTGAGGTTGCACTGGATC |
| <i>Klf4-en</i> | NM_001031782.1          | F: AGATGAACTGACCAGGCACTACCG<br>R: TGTTGGGAACTTGACCATGATTGTAG |
| <i>Col5a2</i>  | NM_001105289.1          | F: TGTCTGTCTGTCCGCATACAAC<br>R: CGTCCACGTATGCCTGTTACAATAG    |
| <i>18s</i>     | NR_046261.1             | F: TCCAATGGATCCTCGCGGAA<br>R: GGCTACCACATCCAAGGAAG           |
| <i>GAPDH</i>   | NM_001206359.1          | F: GCAAAGTGGACATTGTGCGCCATCA<br>R: TCCTGGAAGATGGTGTATGGCCTTT |

F, forward; R, reverse.
